# Supplementary material for: Improved Therapeutic Efficacy of MT102, a New Anti-Inflammatory Agent, via a Self-Microemulsifying Drug Delivery System, in Ulcerative Colitis Mice
Source: MDPI journal article supplement (doi:10.3390/pharmaceutics15122720), 2023-12-02
Supplement: s1 [file s1]

# Supplementary Material: Improved Therapeutic Efficacy of MT102, a New Anti-Inflammatory Agent, via a Self-Microemulsifying Drug Delivery System in Ulcerative Colitis Mice

Kshitis Chandra Baral, Sang Hoon Lee, Jae Geun Song, Seong Hoon Jeong and Hyo-Kyung Han

**Table S1.** Characteristics of drug-loaded SMEDDS at the different ratios of oil and  $S_{mix}$  (mean  $\pm$  SD,  $n=3$ ).

| Ratio (w/w) |             | Size (nm)        | PDI             | Zeta Potential (mV) | Indirubin content ( $\mu\text{g/g}$ ) | Emulsification time (Sec.) | % Transmittance  |
|-------------|-------------|------------------|-----------------|---------------------|---------------------------------------|----------------------------|------------------|
| Oil         | $S_{mix}^*$ |                  |                 |                     |                                       |                            |                  |
| 10          | 90          | 118.7 $\pm$ 6.32 | 0.41 $\pm$ 0.08 | -7.87 $\pm$ 0.36    | 242.84 $\pm$ 6.56                     | 31                         | 85.03 $\pm$ 0.67 |
| 20          | 80          | 249.5 $\pm$ 4.08 | 0.27 $\pm$ 0.02 | -7.62 $\pm$ 0.54    | 193.21 $\pm$ 14.91                    | 22                         | 79.81 $\pm$ 0.67 |

\* $S_{mix}$ : Tween 80/propylene glycol = 1:1 (w/w).
